# Supplementary material for: Anthropogenic and volcanic point source SO 2 emissions derived fromTROPOMI onboard Sentinel 5 Precursor: first results
Source: Copernicus journal article supplement (doi:10.5194/acp-2019-1095), 2020-01-02
Supplement: Supplementary file [file acp-2019-1095-RC2-supplement.pdf]

This manuscript provides the first SO<sub>2</sub> emissions estimates for ~278 point sources using TROPOMI observations. The method applied has been used before on OMI and OMPS SO<sub>2</sub> data. Results are compared with OMI and OMPS estimates, and specific issues related to the higher spatial resolution of TROPOMI and specific biases in TROPOMI are discussed.

The paper is well suited for this journal. I have the following comments.

- p.5 l. 11-12 'To eliminate ..days then ..' somehow this sentence does not make sense to me.
- P.6 l. 8 what is meant with THIS systematic difference ?
- P.6 l.9 is the 22% the result of this different use of absorption cross sections at different temperatures ?
- P.6 l. 23 What do you mean with shorter exposure times at the edge of the swath. This is not correct I think. The SNR could be lower due to less binning across track, but that has nothing to do with shorter exp. times.
- P.8 if the biases are seasonal dependent what is its effect on the emissions calculated using annual means SO<sub>2</sub> ?
- Data availability : Should the locations (Fig. 9) and emissions (Fig. 10) not be made available through some database connected to the manuscript ? Otherwise other people can not use those.
